# Supplementary material for: Prediction of metabolic fluxes from gene expression data with Huber penalty convex optimization function
Source: Royal Society of Chemistry journal article supplement (doi:10.1039/c6mb00811a), 2017-03-13
Supplement: c6mb00811a2.pdf [file c6mb00811a2.pdf]

Table S6 Sum of squared error (SE) using different objective functions in predicting intracellular fluxes of *E. coli* (Holm) for three strains

| Strains | $J = \sum_{i=1}^m \phi(v_i - z_i) + \ v\ _1$ | $J = \sum_{i=1}^m \phi(v_i - z_i)$ | $J = \ v - b\ _2$ | $J = \ v\ _1$ | $J = \ v - b\ _2 + \ v\ _1$ |
|---------|----------------------------------------------|------------------------------------|-------------------|---------------|-----------------------------|
| REF     | 5.1                                          | 5.1                                | 5.4               | 108.3         | $4.6 \times 10^4$           |
| NOX     | 11.2                                         | 11.7                               | 12.0              | 355.3         | $4.8 \times 10^4$           |
| ATPase  | 14.1                                         | 14.5                               | 14.5              | 106.2         | $3.9 \times 10^4$           |
| Average | 10.1                                         | 10.4                               | 10.6              | 189.3         | $4.4 \times 10^3$           |
